# Supplementary material for: Evaluation of New Fluorescent Lipophosphoramidates for Gene Transfer and Biodistribution Studies after Systemic Administration
Source: PubMed Central journal article supplement (PMC4661800; doi:10.3390/ijms161125941), 2015-11-02
Supplement: ijms-16-25941-s001.pdf [file ijms-16-25941-s001.pdf]

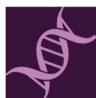

# Supplementary Information

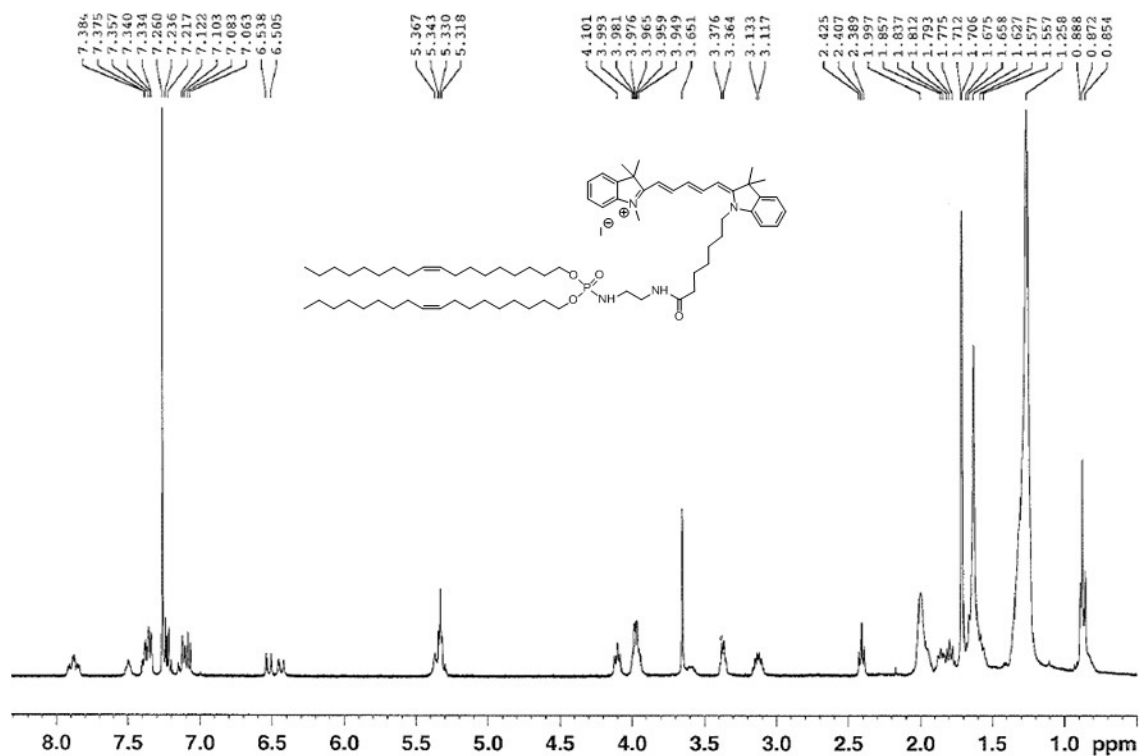

<sup>1</sup>H-NMR spectrum of compound 3

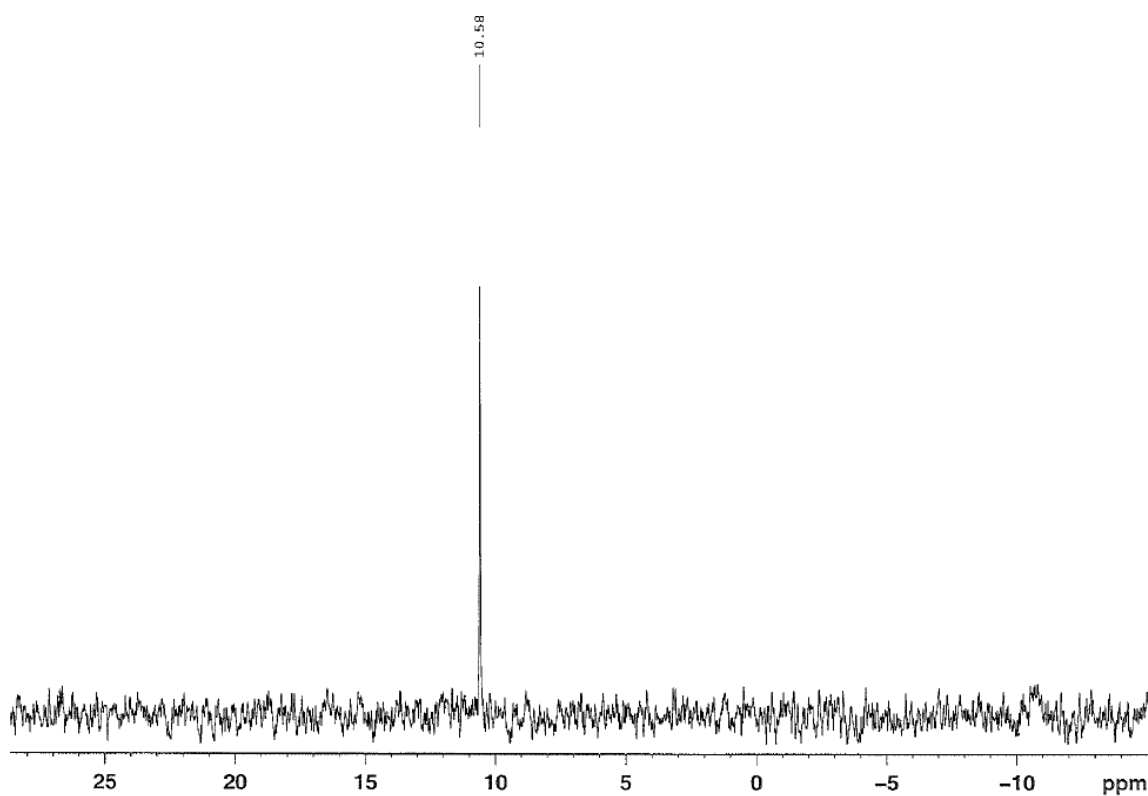

<sup>31</sup>P NMR spectrum of compound 3

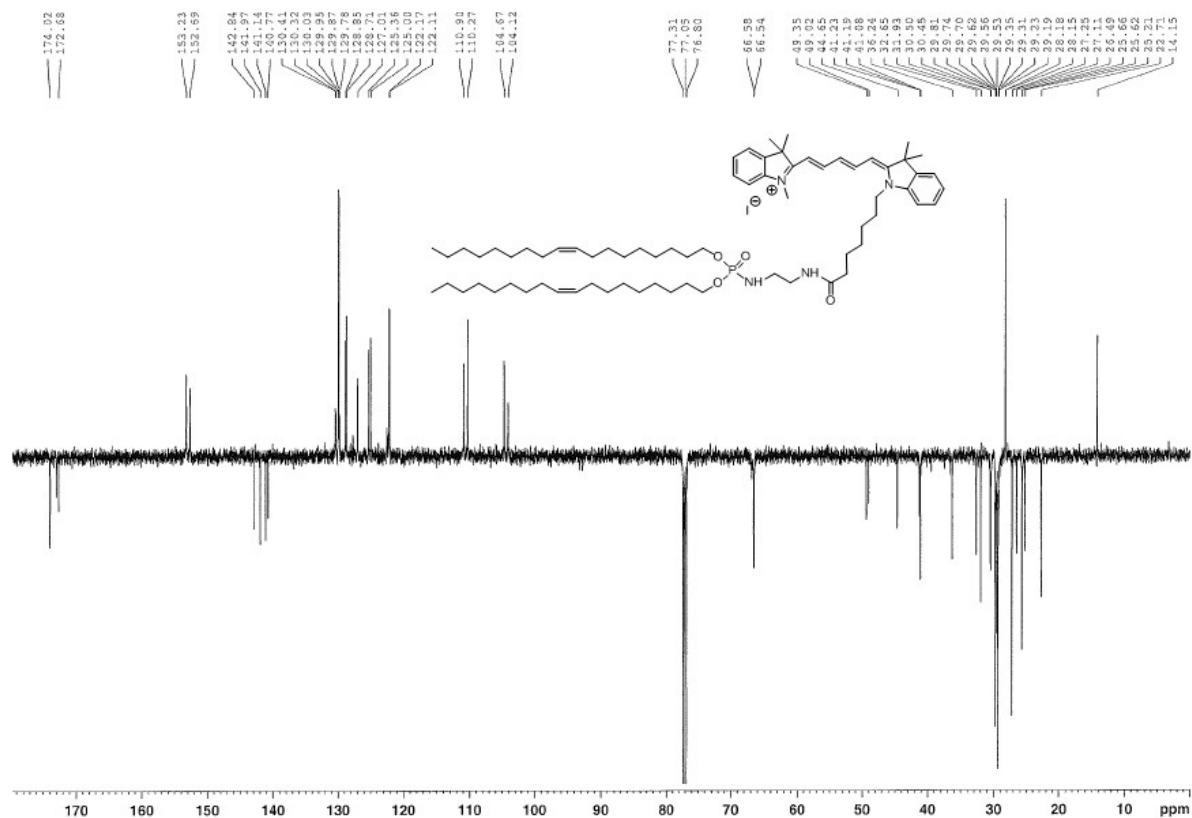

<sup>13</sup>C NMR spectrum of compound 3

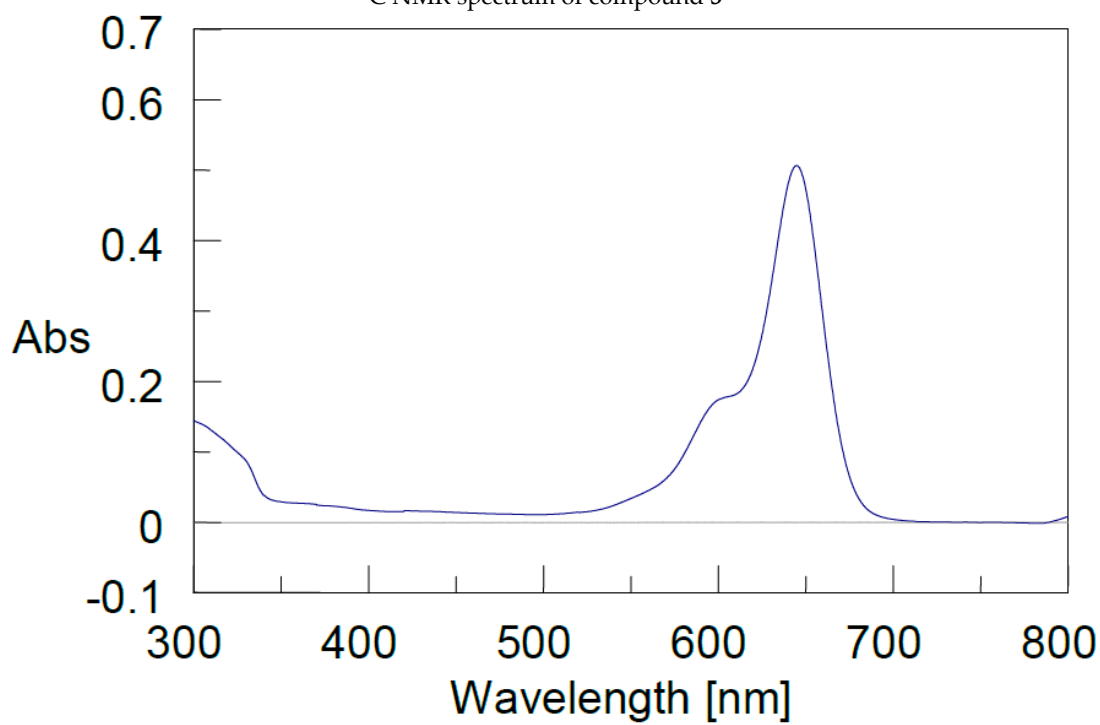

Absorbance and fluorescence spectrum of compound 3

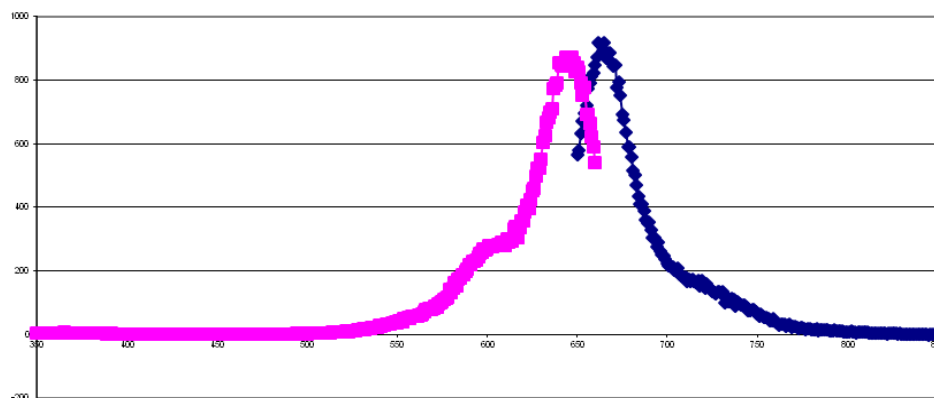

Fluorescence spectrum of compound 3

**Scheme S1.** NMR, absorbance and fluorescence spectra compound 3.
